# Supplementary material for: Photo-assisted synthesis of Au@PtAu core–shell nanoparticles with controllable surface composition for methanol electro-oxidation
Source: Royal Society of Chemistry journal article supplement (doi:10.1039/c6ta07314j), 2016-01-01
Supplement: c6ta07314j1.pdf [file c6ta07314j1.pdf]

## Supporting Information

### Photo-Assisted Synthesis of Au@PtAu Core-Shell Nanoparticles with Controllable Surface Composition for Methanol Electro-oxidation

Tiening Tan,<sup>a</sup> Hao Xie,<sup>b</sup> Jingjing Xie,<sup>a</sup> Hang Ping,<sup>a</sup> Bao-Lian Su,<sup>ac</sup> Weimin Wang,<sup>a</sup> Hao Wang,<sup>a</sup> Zuhair A. Munir,<sup>d</sup> and Zhengyi Fu\*<sup>a</sup>

<sup>a</sup> State Key Laboratory of Advanced Technology for Materials Synthesis and Processing, Wuhan University of Technology, Wuhan, 430070, China. E-mail: zyfu@whut.edu.cn

<sup>b</sup> School of Chemistry, Chemical Engineering, and Life Science, Wuhan University of Technology, Wuhan, 430070, China

<sup>c</sup> Laboratory of Inorganic Materials Chemistry, University of Namur, B-5000 Namur, Belgium

<sup>d</sup> Department of Materials Science and Engineering, University of California, Davis, CA 95616, USA

**Table S1.** Some reported mass activities of free-standing Pt-Au bimetallic nanomaterials for methanol electro-oxidation

| Materials                                                 | Electrolytes                                                       | Mass activities (A mg <sup>-1</sup> Pt) | References      |
|-----------------------------------------------------------|--------------------------------------------------------------------|-----------------------------------------|-----------------|
| Pt-Au                                                     | 0.5M CH <sub>3</sub> OH+0.1M HClO <sub>4</sub> 50mV/s              | 0.8                                     | [1]             |
| <b>Au@PtAu<sub>0.5</sub></b>                              | <b>1M CH<sub>3</sub>OH+0.1M HClO<sub>4</sub> 50mV/s</b>            | <b>0.76</b>                             | <b>Our work</b> |
| Au <sub>30</sub> -Pt <sub>array</sub>                     | 1M CH <sub>3</sub> OH+0.5M H <sub>2</sub> SO <sub>4</sub>          | 0.66                                    | [2]             |
| Pt-Au                                                     | 1M CH <sub>3</sub> OH+1M HClO <sub>4</sub>                         | 0.625                                   | [3]             |
| Au-Pt alloyed nanowire                                    | 1M CH <sub>3</sub> OH+0.5M H <sub>2</sub> SO <sub>4</sub> 50mV/s   | 0.58                                    | [4]             |
| Au-Pt core-rods                                           | 0.5M CH <sub>3</sub> OH+0.5M H <sub>2</sub> SO <sub>4</sub>        | 0.561                                   | [5]             |
| Au@Pt (Pt <sub>5</sub> Au)                                | 1M CH <sub>3</sub> OH+0.5M H <sub>2</sub> SO <sub>4</sub> 20mV/s   | 0.45                                    | [6]             |
| Pt-on-Au                                                  | 1M CH <sub>3</sub> OH+0.5M H <sub>2</sub> SO <sub>4</sub> 50mV/s   | ~0.43                                   | [7]             |
| Pt <sub>0.81</sub> Au <sub>0.19</sub> alloy core-Pt shell | 2M CH <sub>3</sub> OH+0.1M H <sub>2</sub> SO <sub>4</sub>          | 0.426                                   | [8]             |
| Pt-Au                                                     | ?CH <sub>3</sub> OH+0.1M HClO <sub>4</sub>                         | ~0.38                                   | [9]             |
| Pt-Au alloy                                               | 0.5M CH <sub>3</sub> OH+0.5M H <sub>2</sub> SO <sub>4</sub> 50mV/s | 0.348                                   | [10]            |
| Au-Pt nanowire                                            | 1M CH <sub>3</sub> OH+0.1M HClO <sub>4</sub>                       | ~0.34                                   | [11]            |
| Au@Pt                                                     | 2M CH <sub>3</sub> OH+0.5M H <sub>2</sub> SO <sub>4</sub> 50mV/s   | 0.149                                   | [12]            |
| Au@Pt                                                     | 0.5M CH <sub>3</sub> OH+0.5M H <sub>2</sub> SO <sub>4</sub> 50mV/s | ~0.115                                  | [13]            |

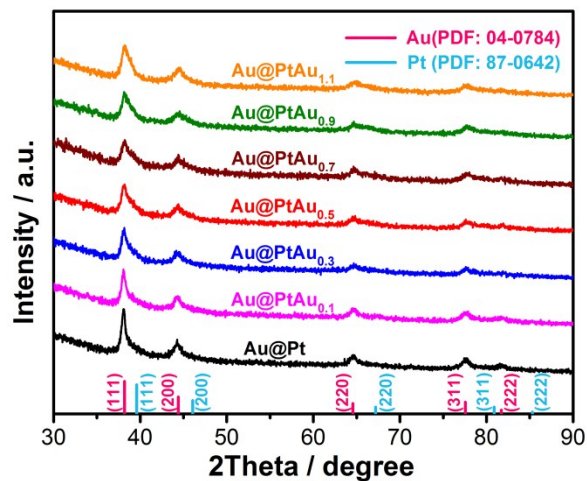

**Fig. S1** The XRD patterns of the as-prepared Au@PtAu<sub>m</sub> NPs, with m: 0-1.1.

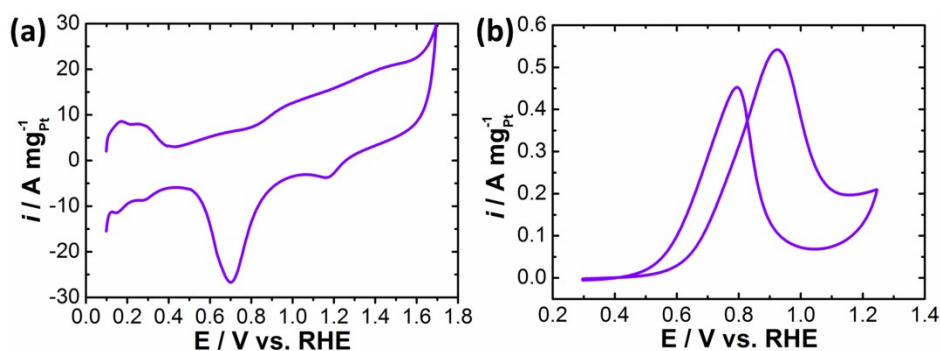

**Fig. S2** The cyclic voltammetry curve (a) and current density (b) toward methanol electro-oxidation in 0.1M HClO<sub>4</sub> of Au@PtAu<sub>0.5</sub> NPs prepared without photo-irradiation. The scan rates are 100mV/s and 50mV/s, respectively.

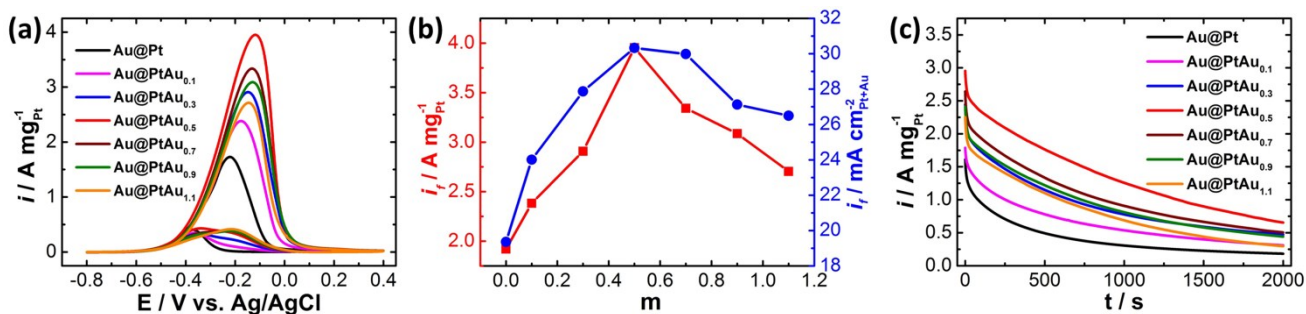

**Fig. S3** Activity, durability and activity variation trend of Au@PtAu<sub>m</sub> NPs toward methanol electro-oxidation. (a) Current densities of Au@PtAu<sub>m</sub> NPs toward methanol electro-oxidation in 1M KOH at 50mV/s. (b) Catalytic activities (corresponding to the peak current densities) variation trend of the as-prepared Au@PtAu<sub>m</sub> NPs normalized either by Pt mass (red curve) or EASA of Pt and Au (blue curve). (c) Long term current-time curves measured in 1M KOH+1M CH<sub>3</sub>OH at -0.2V vs. Ag/AgCl.

## REFERENCES

- [1] H. J. You, F. L. Zhang, Z. Liu and J. X. Fang, *ACS Catal.*, 2014, **4**, 2829-2835.
- [2] M. Y. Duan, R. Liang, N. Tian, Y. J. Li and E. S. Yeung, *Electrochim Acta*, 2013, **87**, 432-437.
- [3] Z. H. Zhang, Y. Wang and X. G. Wang, *Nanoscale*, 2011, **3**, 1663-1674.
- [4] P. Song, S. S. Li, L. L. He, J. J. Feng, L. Wu, S. X. Zhong and A. J. Wang, *RSC Adv.*, 2015, **5**, 87061-87068.

- [5] L. Chen, L. Kuai and B. Y. Geng, 2013, **15**, 2133-2136.
- [6] Y. J. Li, W. C. Ding, M. R. Li, H. B. Xia, D. Y. Wang and X. T. Tao, *J. Mater. Chem. A*, 2015, **3**, 368-376.
- [7] S. J. Guo, J. Li, S. J. Dong and E. K. Wang, , *J. Phys. Chem. C*, 2010, **114**, 15337-15342.
- [8] K. Mikkelsen, B. Cassidy, N. Hofstetter, L. Bergquist, A. Taylor and D. A. Rider, *Chem. Mater.*, 2014, **26**, 6928-6940.
- [9] J. Suntivich, Z. C. Xu, C. E. Carlton, J. Kim, B. H. Han, S. W. Lee, N. Bonnet, N. Marzari, L. F. Allard, H. A. Gasteiger, K. Hamad-Schifferli and Y. Shao-Horn, *J. Am. Chem. Soc.*, 2013, **135**, 7985-7991.
- [10] J. T. Zhang, H. Y. Ma, D. J. Zhang, P. P. Liu, F. Tian and Y. Ding, *Phys. Chem. Chem. Phys.*, 2008, **10**, 3250-3255.
- [11] W. Hong, J. Wang and E. K. Wang, *Small*, 2014, **10**, 3262-3265.
- [12] Z. G. Guo, X. Zhang, H. Sun, X. P. Dai, Y. Yang, X. S. Li and T. T. Meng, *Electrochim Acta*, 2014, **134**, 411-417.
- [13] H. Atae-Esfahani, L. Wang, Y. Nemoto and Y. Yamauchi, *Chem. Mater.*, 2010, **22**, 6310-6318.
